# Supplementary material for: Updated European Hydraulic Pedotransfer Functions with Communicated Uncertainties in the Predicted Variables (euptfv2)
Source: Preprints.org preprint supplement (doi:10.20944/preprints202002.0425.v1), 2020-02-28
Supplement: Supplementary file 3 [file supplementary]

Supplement of

Updated European hydraulic pedotransfer functions with communicated uncertainties in the predicted variables (euptfv2)

Brigitta Szabó et al.

***** Correspondence: [toth.brigitta@agrar.mta.hu](mailto:toth.brigitta@agrar.mta.hu) (B.Sz.)


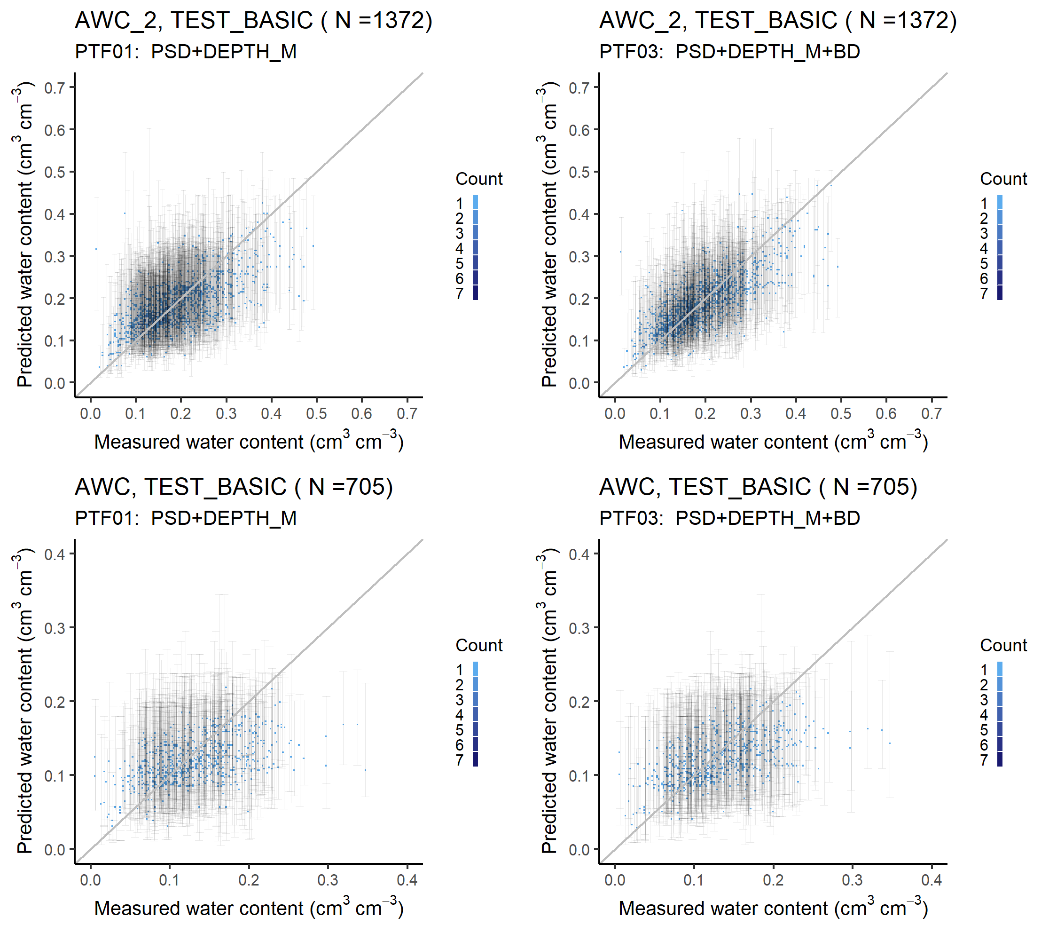


**Figure S1.** The scatter plot of the measured versus predicted plant available water content values of the worst and best performing PTF with 90% prediction interval on test datasets. AWC_2: plant available water content based on filed capacity at -100 cm matric potential head (PTF01 vs. PTF03); AWC: plant available water content based on filed capacity at -330 cm matric potential head (PTF01 vs. PTF03); PSD: particle size distribution (sand, 50–2000 μm; silt, 2–50 μm; clay, <2 μm (mass %)); DEPTH_M: mean soil depth (cm); BD: bulk density (g cm−3).

**Table S1.** Performance of pedotransfer functions (PTF) by input combination on training and test datasets to predict the plant available water content of the soil (AWC_2) belonging to the -100 cm matric potential head. N: number of samples, RMSE: root mean square error **(**cm3 cm-3**)**, and R2: determination coefficient, TEST_BASIC: samples with measured PSD, DEPTH, OC and BD; TEST_CHEM+: samples with measured PSD, DEPTH, OC, BD, CACO3, PH_H2O and CEC. Recommended PTFs are highlighted in bold.

| **Name of PTF in euptfv2** | **Predictor variables1** | **Training set** | | | **Test set** | | | **Sign. difference2** | | **Recommended PTF** |
| --- | --- | --- | --- | --- | --- | --- | --- | --- | --- | --- |
| **N** | **RMSE** | **R2** | **N** | **RMSE** | **R2** | **TEST_BASIC set** | **TEST_CHEM+ set** |
| **PTF01** | **PSD+DEPTH** | 3528 | 0.062 | 0.446 | 1372 | 0.060 | 0.432 | a | ab | PTF01 |
| **PTF02** | **PSD+DEPTH+OC** | 3208 | 0.055 | 0.540 | 1372 | 0.054 | 0.544 | b | abcd | PTF02 |
| **PTF03** | **PSD+DEPTH+BD** | 3472 | 0.054 | 0.581 | 1372 | 0.053 | 0.552 | b | abcd | PTF03 |
| PTF04 | PSD+DEPTH+CACO3 | 1548 | 0.050 | 0.326 | 274 | 0.055 | 0.219 | - | abcd | PTF01 |
| PTF05 | PSD+DEPTH+PH_H2O | 1849 | 0.058 | 0.463 | 274 | 0.055 | 0.216 | - | a | PTF01 |
| PTF06 | PSD+DEPTH+CEC | 1550 | 0.059 | 0.512 | 274 | 0.060 | 0.050 | - | abcd | PTF01 |
| PTF07 | PSD+DEPTH+OC+BD | 3197 | 0.051 | 0.609 | 1372 | 0.051 | 0.588 | b | abcd | PTF03 |
| PTF08 | PSD+DEPTH+OC+CACO3 | 1464 | 0.048 | 0.353 | 274 | 0.053 | 0.257 | - | abcd | PTF02 |
| PTF09 | PSD+DEPTH+OC+PH_H2O | 1615 | 0.055 | 0.490 | 274 | 0.053 | 0.270 | - | abc | PTF02 |
| PTF10 | PSD+DEPTH+OC+CEC | 1358 | 0.054 | 0.563 | 274 | 0.053 | 0.278 | - | abcd | PTF02 |
| PTF11 | PSD+DEPTH+BD+CACO3 | 1545 | 0.044 | 0.470 | 274 | 0.048 | 0.396 | - | d | PTF03 |
| PTF12 | PSD+DEPTH+BD+PH_H2O | 1796 | 0.052 | 0.565 | 274 | 0.048 | 0.406 | - | abcd | PTF03 |
| PTF13 | PSD+DEPTH+BD+CEC | 1498 | 0.053 | 0.598 | 274 | 0.048 | 0.398 | - | abcd | PTF03 |
| PTF14 | PSD+DEPTH+CACO3+PH_H2O | 1195 | 0.051 | 0.341 | 274 | 0.052 | 0.284 | - | abcd | PTF01 |
| PTF15 | PSD+DEPTH+CACO3+CEC | 726 | 0.050 | 0.286 | 274 | 0.052 | 0.303 | - | abcd | PTF01 |
| PTF16 | PSD+DEPTH+PH_H2O+CEC | 1255 | 0.058 | 0.539 | 274 | 0.051 | 0.331 | - | abcd | PTF01 |
| PTF17 | PSD+DEPTH+OC+BD+CACO3 | 1464 | 0.044 | 0.465 | 274 | 0.048 | 0.390 | - | bcd | PTF03 |
| PTF18 | PSD+DEPTH+OC+BD+PH_H2O | 1607 | 0.051 | 0.556 | 274 | 0.048 | 0.407 | - | abcd | PTF03 |
| PTF19 | PSD+DEPTH+OC+BD+CEC | 1349 | 0.052 | 0.593 | 274 | 0.046 | 0.441 | - | abcd | PTF03 |
| PTF20 | PSD+DEPTH+OC+CACO3+PH_H2O | 1130 | 0.050 | 0.367 | 274 | 0.051 | 0.309 | - | abcd | PTF02 |
| PTF21 | PSD+DEPTH+OC+CACO3+CEC | 683 | 0.049 | 0.305 | 274 | 0.050 | 0.359 | - | abcd | PTF02 |
| PTF22 | PSD+DEPTH+OC+PH_H2O+CEC | 1067 | 0.054 | 0.561 | 274 | 0.049 | 0.367 | - | abcd | PTF02 |
| PTF23 | PSD+DEPTH+BD+CACO3+PH_H2O | 1192 | 0.046 | 0.471 | 274 | 0.049 | 0.375 | - | bcd | PTF03 |
| PTF24 | PSD+DEPTH+BD+CACO3+CEC | 725 | 0.045 | 0.420 | 274 | 0.046 | 0.444 | - | d | PTF03 |
| PTF25 | PSD+DEPTH+BD+PH_H2O+CEC | 1204 | 0.052 | 0.621 | 274 | 0.046 | 0.456 | - | abcd | PTF03 |
| PTF26 | PSD+DEPTH+CACO3+PH_H2O+CEC | 684 | 0.049 | 0.318 | 274 | 0.048 | 0.388 | - | abcd | PTF01 |
| PTF27 | PSD+DEPTH+OC+BD+CACO3+PH_H2O | 1130 | 0.045 | 0.475 | 274 | 0.049 | 0.367 | - | abcd | PTF03 |
| PTF28 | PSD+DEPTH+OC+BD+CACO3+CEC | 683 | 0.045 | 0.408 | 274 | 0.045 | 0.466 | - | bcd | PTF03 |
| PTF29 | PSD+DEPTH+OC+BD+PH_H2O+CEC | 1059 | 0.052 | 0.603 | 274 | 0.045 | 0.473 | - | bcd | PTF03 |
| PTF30 | PSD+DEPTH+OC+CACO3+PH_H2O+CEC | 641 | 0.049 | 0.330 | 274 | 0.048 | 0.393 | - | abcd | PTF02 |
| PTF31 | PSD+DEPTH+BD+CACO3+PH_H2O+CEC | 683 | 0.044 | 0.450 | 274 | 0.045 | 0.480 | - | cd | PTF03 |
| PTF32 | PSD+DEPTH+OC+BD+CACO3+PH_H2O+CEC | 641 | 0.045 | 0.425 | 274 | 0.045 | 0.471 | - | cd | PTF03 |

1PSD: particle size distribution (sand, 50–2000 μm; silt, 2–50 μm; clay, <2 μm (mass %)); DEPTH: mean soil depth (cm); OC: organic carbon content (mass %); BD: bulk density (g cm−3); CACO3: calcium carbonate content (mass %); PH_H2O: pH in water (-); CEC: cation exchange capacity (cmol (+) kg−1).

2Different letters indicate significant differences at the 0.05 level between the accuracy of the methods based on the squared error; for example performance indicated with the letter c is significantly better than the one noted with letters b and a.

**Table S2.** Performance of pedotransfer functions (PTF) by input combination on training and test datasets to predict the plant available water content of the soil (AWC) belonging to the -330 cm matric potential head. N: number of samples, RMSE: root mean square error **(**cm3 cm-3**)**, and R2: determination coefficient, TEST_BASIC: samples with measured PSD, DEPTH, OC and BD; TEST_CHEM+: samples with measured PSD, DEPTH, OC, BD, CACO3, PH_H2O and CEC. Recommended PTFs are highlighted in bold.

| **Name of PTF in euptf euptfv2** | **Predictor variables1** | **Training set** | | | **Test set** | | | **Sign. difference2** | | **Recommended PTF** |
| --- | --- | --- | --- | --- | --- | --- | --- | --- | --- | --- |
| **N** | **RMSE** | **R2** | **N** | **RMSE** | **R2** | **TEST_BASIC set** | **TEST_CHEM+ set** |
| **PTF01** | **PSD+DEPTH** | 1863 | 0.042 | 0.312 | 705 | 0.048 | 0.196 | a | a | PTF01 |
| PTF02 | PSD+DEPTH+OC | 1650 | 0.041 | 0.337 | 705 | 0.045 | 0.288 | ab | a | PTF01 |
| **PTF03** | **PSD+DEPTH+BD** | 1849 | 0.040 | 0.374 | 705 | 0.045 | 0.285 | ab | a | PTF01 |
| PTF04 | PSD+DEPTH+CACO3 | 1531 | 0.040 | 0.366 | 279 | 0.050 | 0.199 | - | a | PTF01 |
| PTF05 | PSD+DEPTH+PH_H2O | 1245 | 0.042 | 0.344 | 279 | 0.048 | 0.238 | - | a | PTF01 |
| PTF06 | PSD+DEPTH+CEC | 1092 | 0.041 | 0.356 | 279 | 0.053 | 0.078 | - | a | PTF01 |
| PTF07 | PSD+DEPTH+OC+BD | 1645 | 0.040 | 0.381 | 705 | 0.043 | 0.337 | b | a | PTF03 |
| PTF08 | PSD+DEPTH+OC+CACO3 | 1336 | 0.041 | 0.345 | 279 | 0.049 | 0.219 | - | a | PTF01 |
| PTF09 | PSD+DEPTH+OC+PH_H2O | 1074 | 0.042 | 0.345 | 279 | 0.048 | 0.242 | - | a | PTF01 |
| PTF10 | PSD+DEPTH+OC+CEC | 998 | 0.039 | 0.413 | 279 | 0.051 | 0.147 | - | a | PTF01 |
| PTF11 | PSD+DEPTH+BD+CACO3 | 1522 | 0.038 | 0.428 | 279 | 0.048 | 0.258 | - | a | PTF01 |
| PTF12 | PSD+DEPTH+BD+PH_H2O | 1236 | 0.039 | 0.429 | 279 | 0.047 | 0.287 | - | a | PTF01 |
| PTF13 | PSD+DEPTH+BD+CEC | 1088 | 0.038 | 0.429 | 279 | 0.049 | 0.231 | - | a | PTF01 |
| PTF14 | PSD+DEPTH+CACO3+PH_H2O | 1230 | 0.041 | 0.376 | 279 | 0.047 | 0.263 | - | a | PTF01 |
| PTF15 | PSD+DEPTH+CACO3+CEC | 791 | 0.041 | 0.366 | 279 | 0.049 | 0.214 | - | a | PTF01 |
| PTF16 | PSD+DEPTH+PH_H2O+CEC | 739 | 0.042 | 0.321 | 279 | 0.048 | 0.237 | - | a | PTF01 |
| PTF17 | PSD+DEPTH+OC+BD+CACO3 | 1334 | 0.039 | 0.399 | 279 | 0.048 | 0.262 | - | a | PTF03 |
| PTF18 | PSD+DEPTH+OC+BD+PH_H2O | 1072 | 0.040 | 0.393 | 279 | 0.047 | 0.293 | - | a | PTF03 |
| PTF19 | PSD+DEPTH+OC+BD+CEC | 995 | 0.038 | 0.432 | 279 | 0.049 | 0.223 | - | a | PTF03 |
| PTF20 | PSD+DEPTH+OC+CACO3+PH_H2O | 1059 | 0.042 | 0.362 | 279 | 0.047 | 0.289 | - | a | PTF01 |
| PTF21 | PSD+DEPTH+OC+CACO3+CEC | 707 | 0.041 | 0.358 | 279 | 0.049 | 0.229 | - | a | PTF01 |
| PTF22 | PSD+DEPTH+OC+PH_H2O+CEC | 660 | 0.041 | 0.339 | 279 | 0.048 | 0.253 | - | a | PTF01 |
| PTF23 | PSD+DEPTH+BD+CACO3+PH_H2O | 1221 | 0.039 | 0.442 | 279 | 0.047 | 0.267 | - | a | PTF01 |
| PTF24 | PSD+DEPTH+BD+CACO3+CEC | 788 | 0.039 | 0.405 | 279 | 0.047 | 0.269 | - | a | PTF01 |
| PTF25 | PSD+DEPTH+BD+PH_H2O+CEC | 736 | 0.039 | 0.402 | 279 | 0.046 | 0.307 | - | a | PTF01 |
| PTF26 | PSD+DEPTH+CACO3+PH_H2O+CEC | 732 | 0.040 | 0.405 | 279 | 0.048 | 0.254 | - | a | PTF01 |
| PTF27 | PSD+DEPTH+OC+BD+CACO3+PH_H2O | 1057 | 0.040 | 0.415 | 279 | 0.046 | 0.312 | - | a | PTF03 |
| PTF28 | PSD+DEPTH+OC+BD+CACO3+CEC | 705 | 0.040 | 0.383 | 279 | 0.047 | 0.277 | - | a | PTF03 |
| PTF29 | PSD+DEPTH+OC+BD+PH_H2O+CEC | 658 | 0.040 | 0.385 | 279 | 0.046 | 0.315 | - | a | PTF03 |
| PTF30 | PSD+DEPTH+OC+CACO3+PH_H2O+CEC | 653 | 0.040 | 0.395 | 279 | 0.047 | 0.274 | - | a | PTF01 |
| PTF31 | PSD+DEPTH+BD+CACO3+PH_H2O+CEC | 729 | 0.039 | 0.431 | 279 | 0.047 | 0.290 | - | a | PTF01 |
| PTF32 | PSD+DEPTH+OC+BD+CACO3+PH_H2O+CEC | 651 | 0.039 | 0.403 | 279 | 0.046 | 0.307 | - | a | PTF03 |

1PSD: particle size distribution (sand, 50–2000 μm; silt, 2–50 μm; clay, <2 μm (mass %)); DEPTH: mean soil depth (cm); OC: organic carbon content (mass %); BD: bulk density (g cm−3); CACO3: calcium carbonate content (mass %); PH_H2O: pH in water (-); CEC: cation exchange capacity (cmol (+) kg−1).

2Different letters indicate significant differences at the 0.05 level between the accuracy of the methods based on the squared error;for example performance indicated with the letter c is significantly better than the one noted with letters b and a.


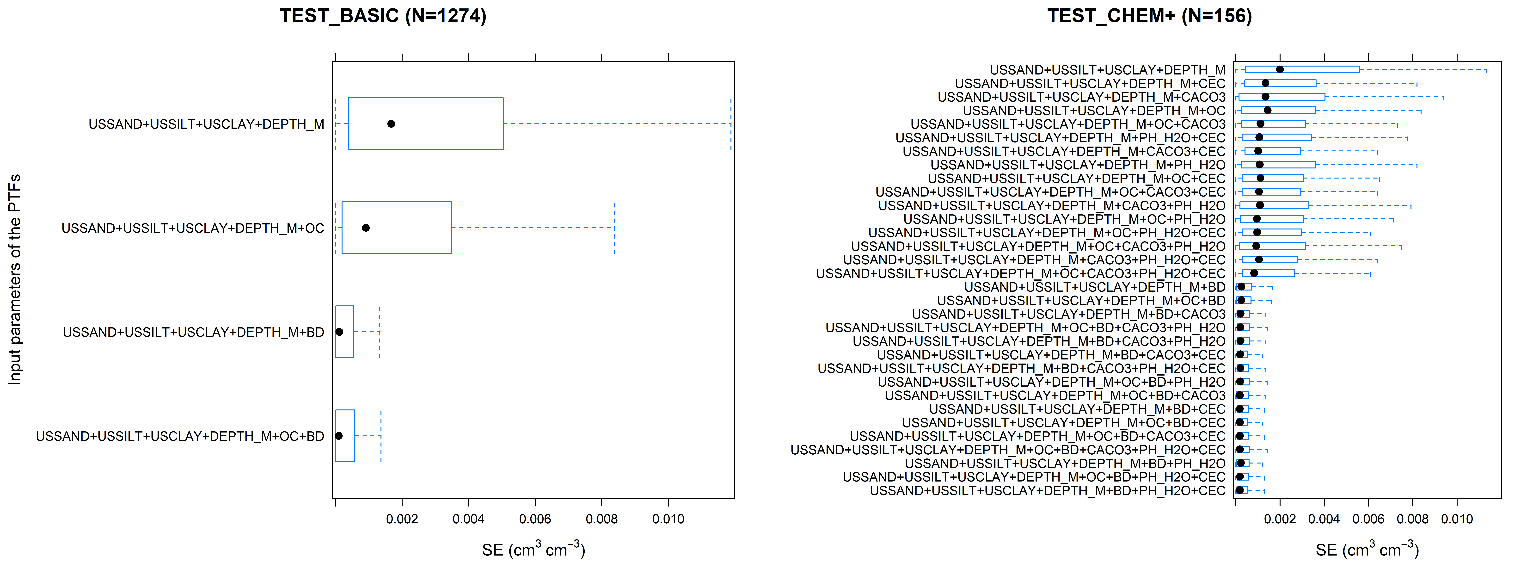


**Figure S2.** Squared error (SE) of the pedotransfer functions derived to predict water content at saturation (THS) computed on TEST_BASIC and TEST_CHEM+ set. USSAND: sand (50–2000 μm) content (mass %); USSILT: silt (2–50 μm) content (mass %), USCLAY: clay (<2 μm) content (mass %); DEPTH_M: mean soil depth (cm); OC: organic carbon content (mass %); BD: bulk density (g cm−3); CACO3: calcium carbonate content (mass %); PH_H2O: pH in water (-); CEC: cation exchange capacity (cmol (+) kg−1).


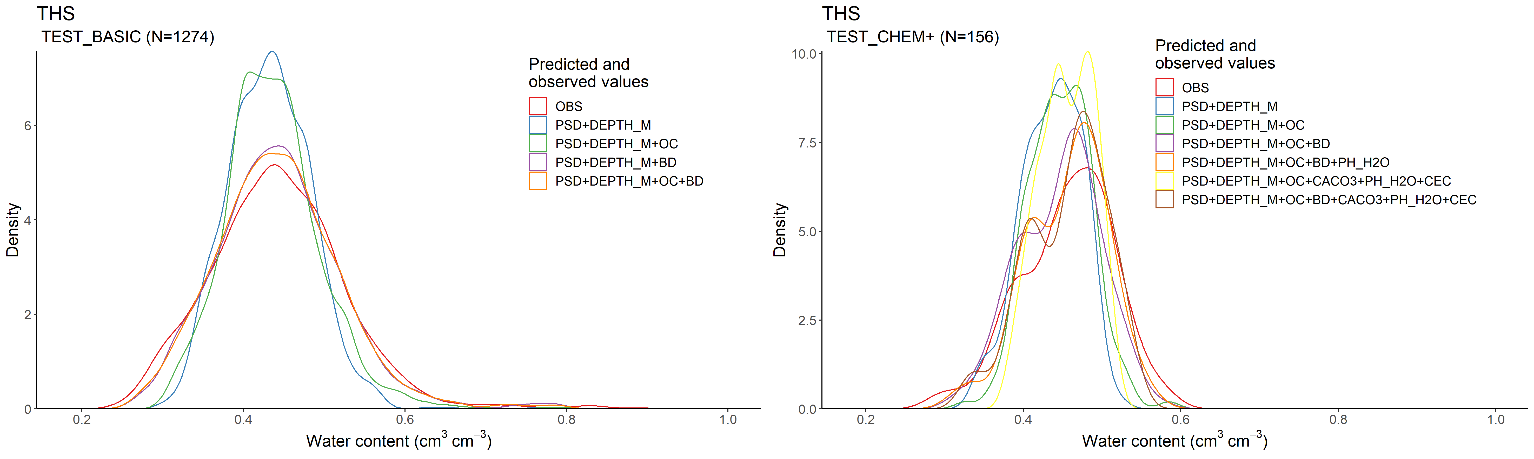


**Figure S3.** Density plot of observed (OBS) and predicted median (USSAND+USSILT+USCLAY+DEPTH_M+*) water content at saturation (THS) for selected pedotransfer functions, computed on TEST_BASIC and TEST_CHEM+ set. USSAND: sand (50–2000 μm) content (mass %); USSILT: silt (2–50 μm) content (mass %), USCLAY: clay (<2 μm) content (mass %); DEPTH_M: mean soil depth (cm); OC: organic carbon content (mass %); BD: bulk density (g cm−3); CACO3: calcium carbonate content (mass %); PH_H2O: pH in water (-); CEC: cation exchange capacity (cmol (+) kg−1).


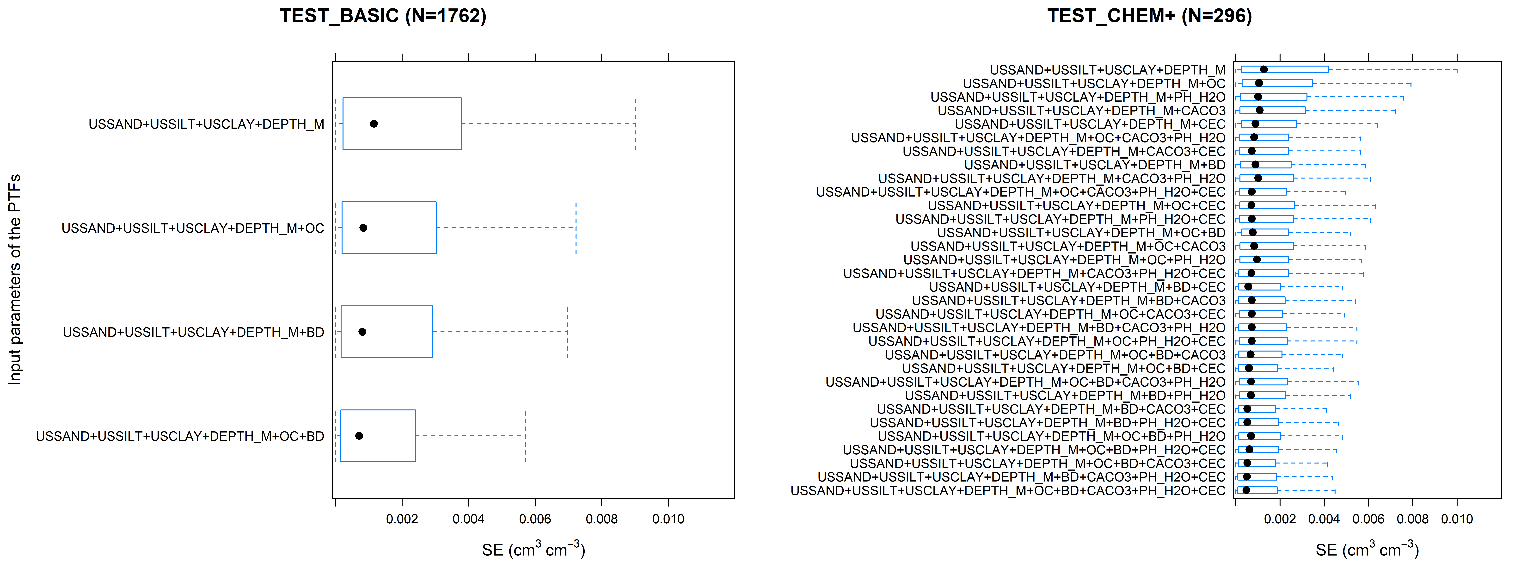


**Figure S4.** Squared error (SE) of the pedotransfer functions derived to predict water content at -100 cm matric potential head (FC_2) computed on TEST_BASIC and TEST_CHEM+ set. USSAND: sand (50–2000 μm) content (mass %); USSILT: silt (2–50 μm) content (mass %), USCLAY: clay (<2 μm) content (mass %); DEPTH_M: mean soil depth (cm); OC: organic carbon content (mass %); BD: bulk density (g cm−3); CACO3: calcium carbonate content (mass %); PH_H2O: pH in water (-); CEC: cation exchange capacity (cmol (+) kg−1).


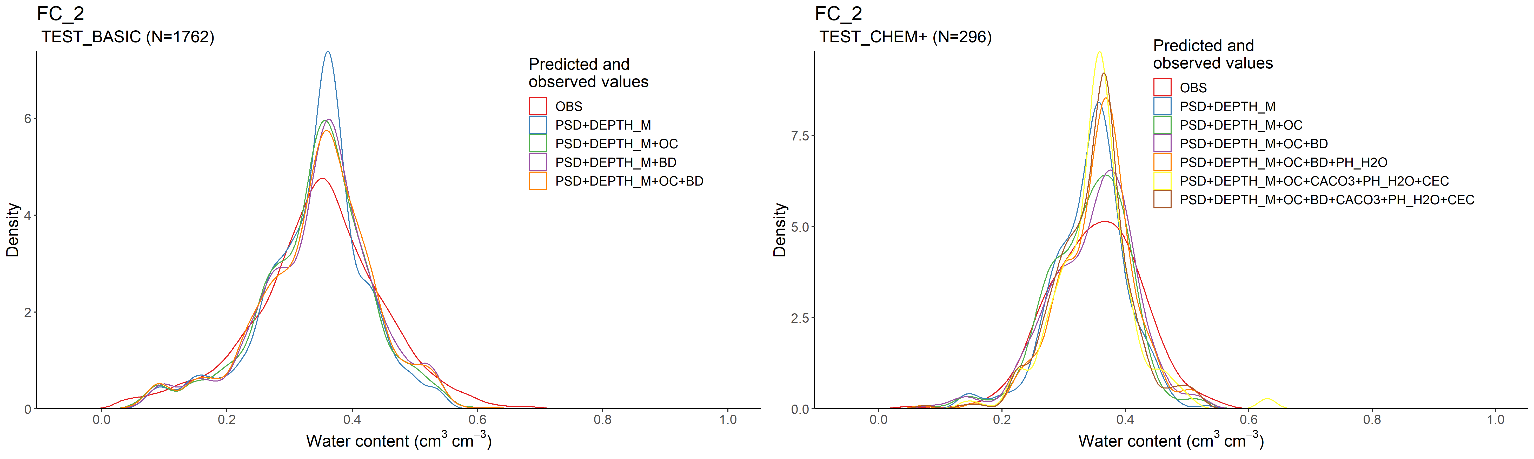


**Figure S5.** Density plot of observed (OBS) and predicted median (USSAND+USSILT+USCLAY+DEPTH_M+*) water content at -100 cm matric potential head (FC_2) for selected pedotransfer functions, computed on TEST_BASIC and TEST_CHEM+ set. USSAND: sand (50–2000 μm) content (mass %); USSILT: silt (2–50 μm) content (mass %), USCLAY: clay (<2 μm) content (mass %); DEPTH_M: mean soil depth (cm); OC: organic carbon content (mass %); BD: bulk density (g cm−3); CACO3: calcium carbonate content (mass %); PH_H2O: pH in water (-); CEC: cation exchange capacity (cmol (+) kg−1).


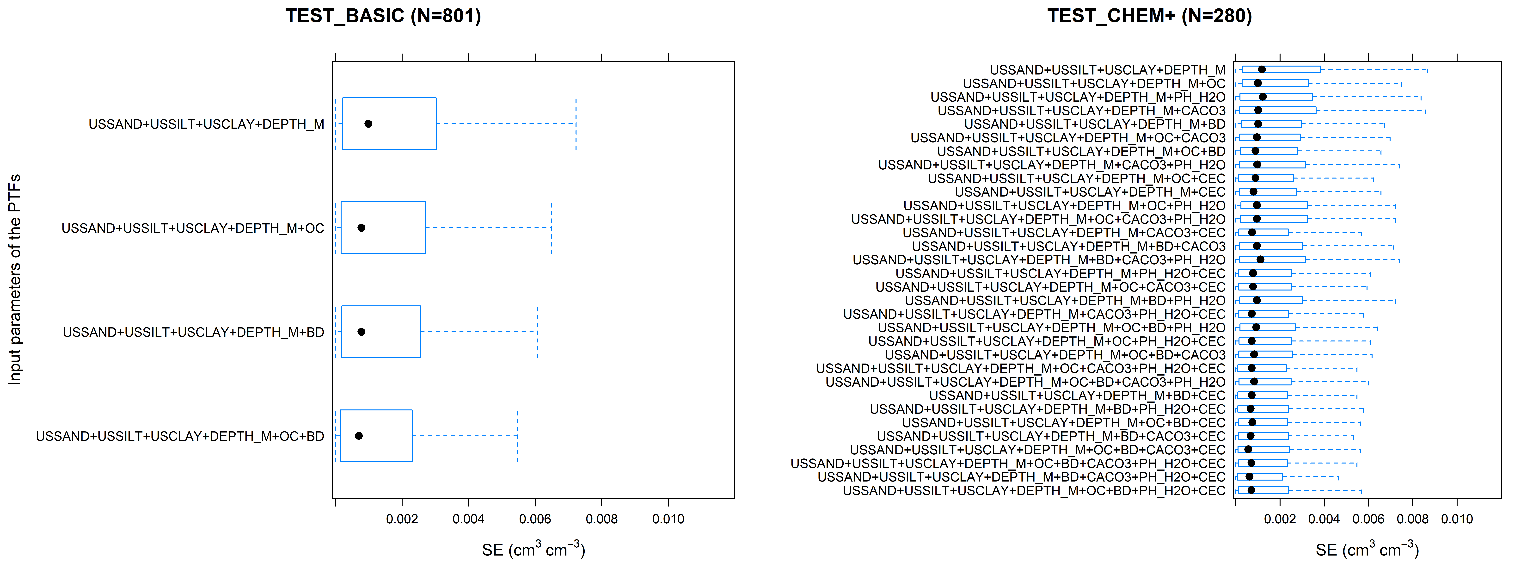


**Figure S6.** Squared error (SE) of the pedotransfer functions derived to predict water content at -330 cm matric potential head (FC) computed on TEST_BASIC and TEST_CHEM+ set. USSAND: sand (50–2000 μm) content (mass %); USSILT: silt (2–50 μm) content (mass %), USCLAY: clay (<2 μm) content (mass %); DEPTH_M: mean soil depth (cm); OC: organic carbon content (mass %); BD: bulk density (g cm−3); CACO3: calcium carbonate content (mass %); PH_H2O: pH in water (-); CEC: cation exchange capacity (cmol (+) kg−1).


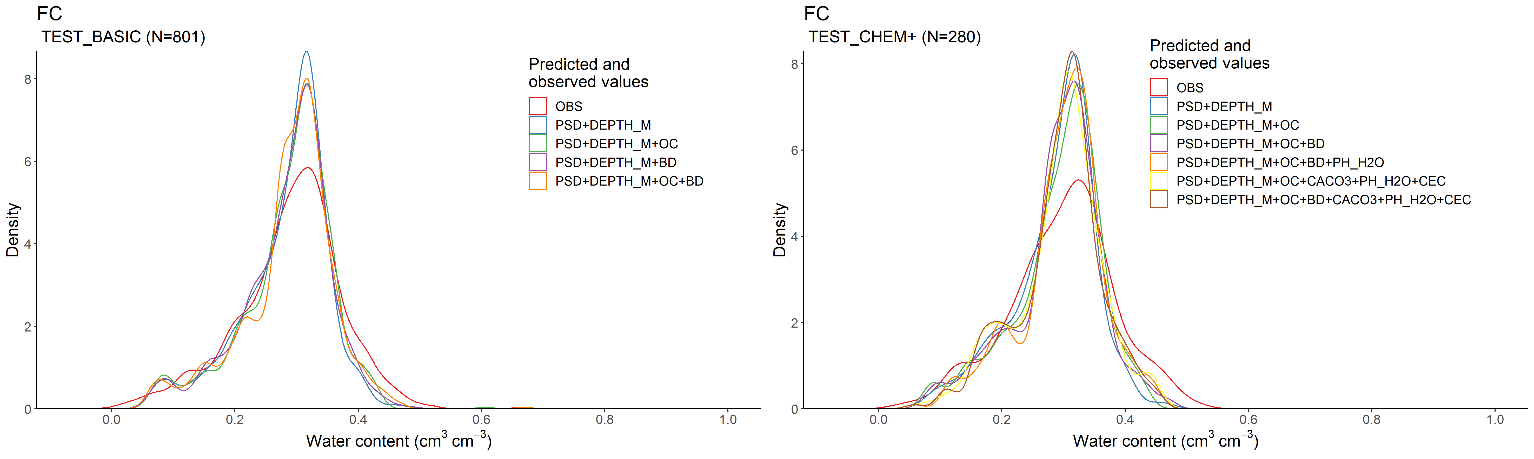


**Figure S7.** Density plot of observed (OBS) and predicted median (USSAND+USSILT+USCLAY+DEPTH_M+*) water content at -330 cm matric potential head (FC) for selected pedotransfer functions, computed on TEST_BASIC and TEST_CHEM+ set. USSAND: sand (50–2000 μm) content (mass %); USSILT: silt (2–50 μm) content (mass %), USCLAY: clay (<2 μm) content (mass %); DEPTH_M: mean soil depth (cm); OC: organic carbon content (mass %); BD: bulk density (g cm−3); CACO3: calcium carbonate content (mass %); PH_H2O: pH in water (-); CEC: cation exchange capacity (cmol (+) kg−1).


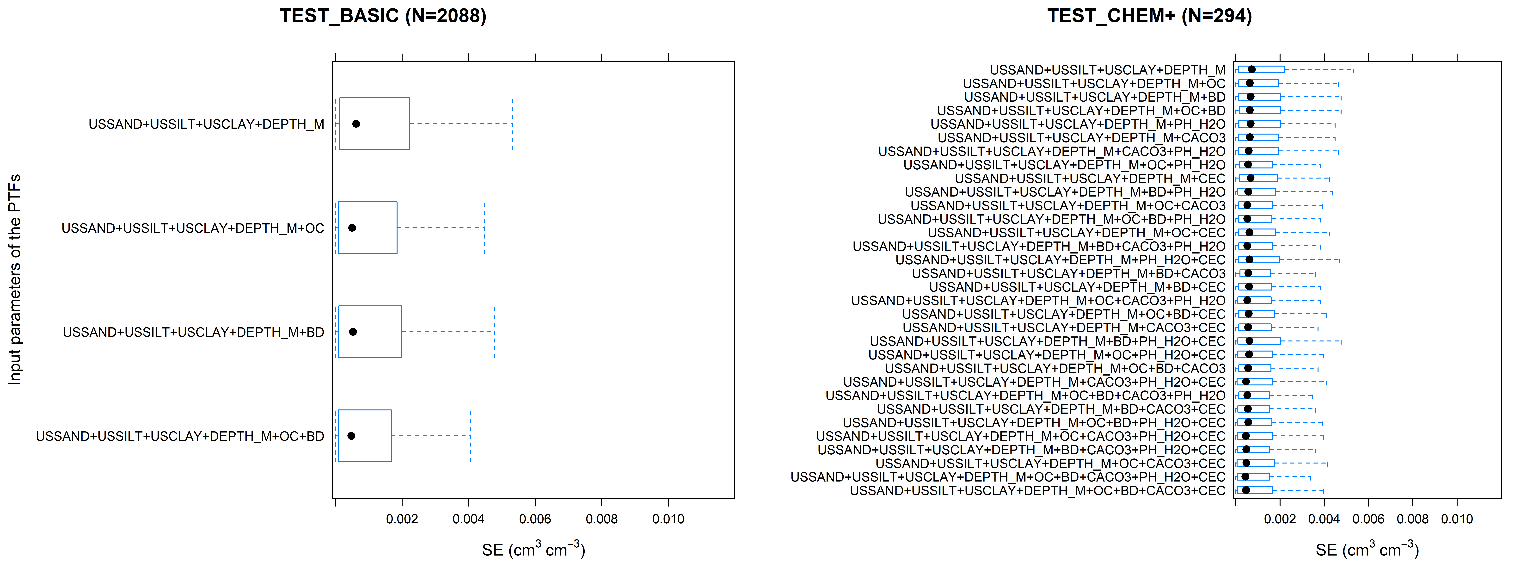


**Figure S8.** Squared error (SE) of the pedotransfer functions derived to predict water content at wilting point (WP) computed on TEST_BASIC and TEST_CHEM+ set. USSAND: sand (50–2000 μm) content (mass %); USSILT: silt (2–50 μm) content (mass %), USCLAY: clay (<2 μm) content (mass %); DEPTH_M: mean soil depth (cm); OC: organic carbon content (mass %); BD: bulk density (g cm−3); CACO3: calcium carbonate content (mass %); PH_H2O: pH in water (-); CEC: cation exchange capacity (cmol (+) kg−1).


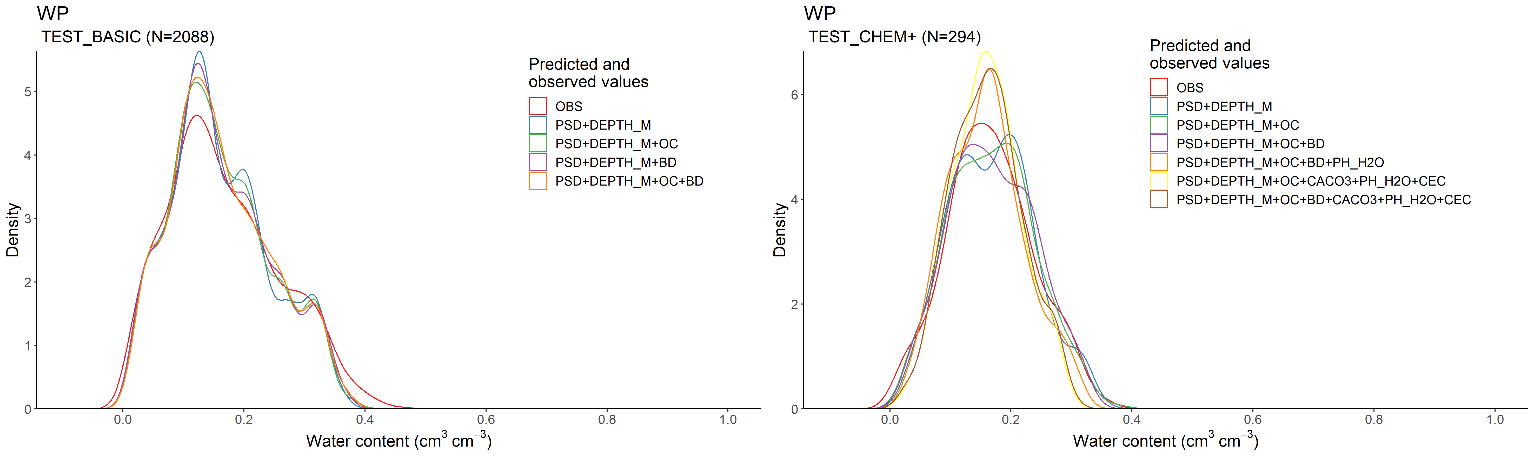


**Figure S9.** Density plot of observed (OBS) and predicted median (USSAND+USSILT+USCLAY+DEPTH_M+*) water content at wilting point (WP) for selected pedotransfer functions, computed on TEST_BASIC and TEST_CHEM+ set. USSAND: sand (50–2000 μm) content (mass %); USSILT: silt (2–50 μm) content (mass %), USCLAY: clay (<2 μm) content (mass %); DEPTH_M: mean soil depth (cm); OC: organic carbon content (mass %); BD: bulk density (g cm−3); CACO3: calcium carbonate content (mass %); PH_H2O: pH in water (-); CEC: cation exchange capacity (cmol (+) kg−1).


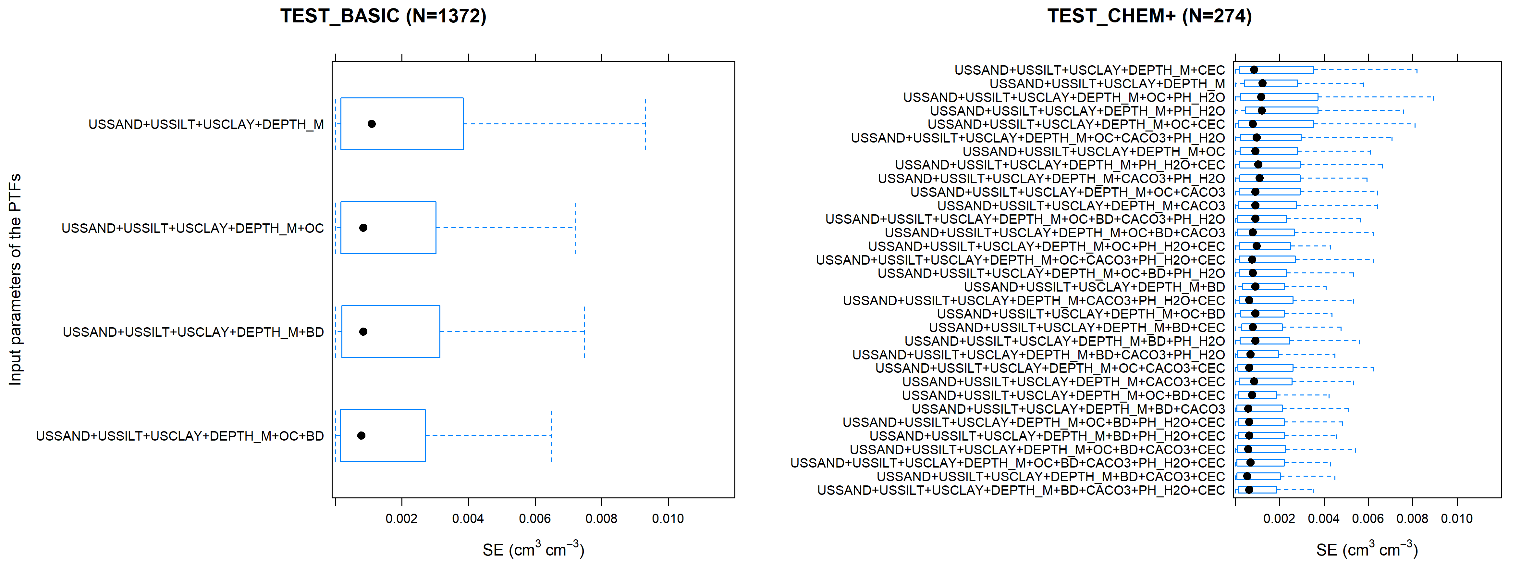


**Figure S10.** Squared error (SE) of the pedotransfer functions derived to predict plant available water content (AWC_2) considering field capacity at -100 matric potential head (FC_2), computed on TEST_BASIC and TEST_CHEM+ set. USSAND: sand (50–2000 μm) content (mass %); USSILT: silt (2–50 μm) content (mass %), USCLAY: clay (<2 μm) content (mass %); DEPTH_M: mean soil depth (cm); OC: organic carbon content (mass %); BD: bulk density (g cm−3); CACO3: calcium carbonate content (mass %); PH_H2O: pH in water (-); CEC: cation exchange capacity (cmol (+) kg−1).


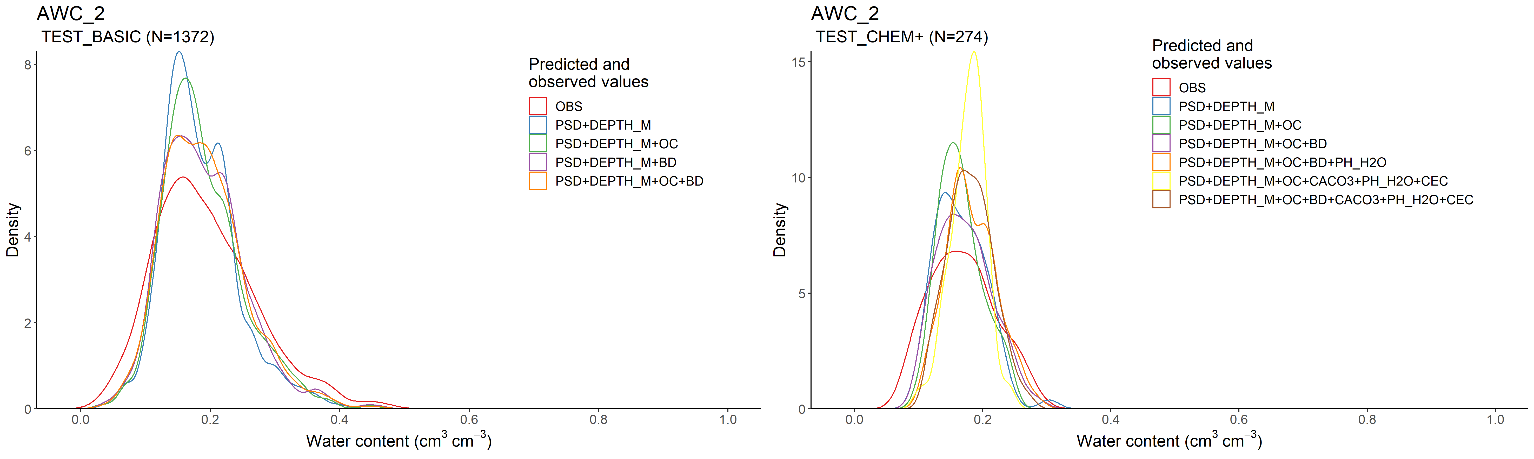


**Figure S11.** Density plot of observed (OBS) and predicted median (USSAND+USSILT+USCLAY+DEPTH_M+*) plant available water content (AWC_2) considering field capacity at -100 matric potential head (FC_2) for selected pedotransfer functions, computed on TEST_BASIC and TEST_CHEM+ set. USSAND: sand (50–2000 μm) content (mass %); USSILT: silt (2–50 μm) content (mass %), USCLAY: clay (<2 μm) content (mass %); DEPTH_M: mean soil depth (cm); OC: organic carbon content (mass %); BD: bulk density (g cm−3); CACO3: calcium carbonate content (mass %); PH_H2O: pH in water (-); CEC: cation exchange capacity (cmol (+) kg−1).


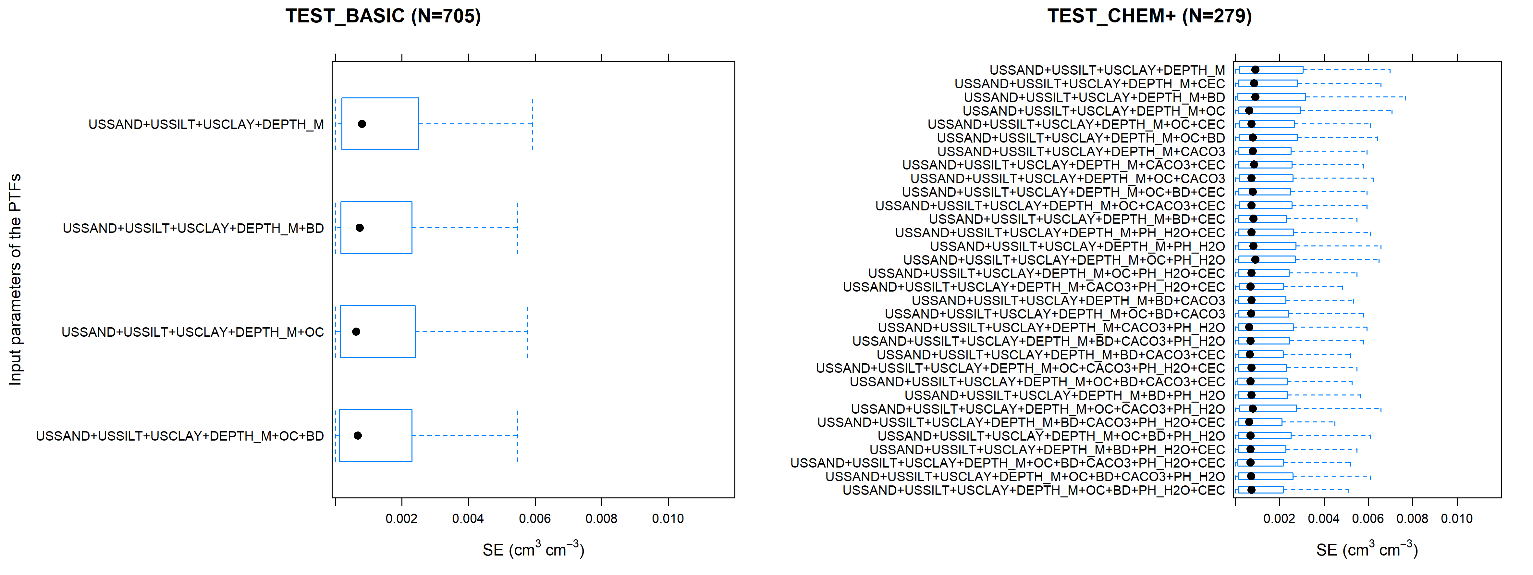


**Figure S12.** Squared error (SE) of the pedotransfer functions derived to predict plant available water content (AWC) considering field capacity at -330 matric potential head (FC), computed on TEST_BASIC and TEST_CHEM+ set. USSAND: sand (50–2000 μm) content (mass %); USSILT: silt (2–50 μm) content (mass %), USCLAY: clay (<2 μm) content (mass %); DEPTH_M: mean soil depth (cm); OC: organic carbon content (mass %); BD: bulk density (g cm−3); CACO3: calcium carbonate content (mass %); PH_H2O: pH in water (-); CEC: cation exchange capacity (cmol (+) kg−1).


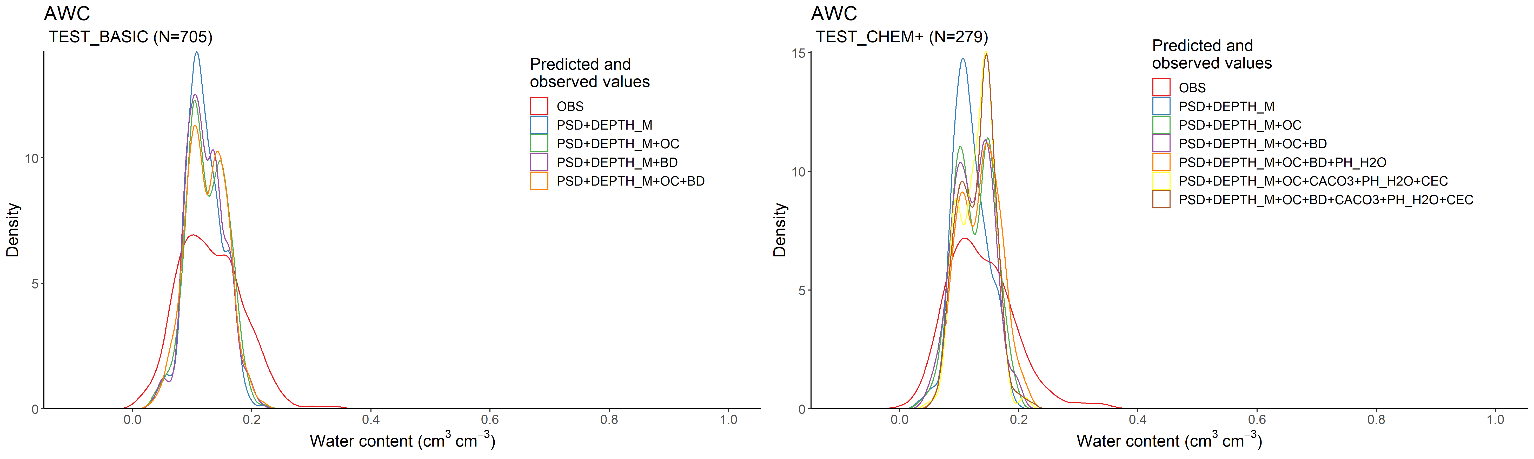


**Figure S13.** Density plot of observed (OBS) and predicted median (USSAND+USSILT+USCLAY+DEPTH_M+*) plant available water content (AWC) considering field capacity at -330 matric potential head (FC) for selected pedotransfer functions, computed on TEST_BASIC and TEST_CHEM+ set. USSAND: sand (50–2000 μm) content (mass %); USSILT: silt (2–50 μm) content (mass %), USCLAY: clay (<2 μm) content (mass %); DEPTH_M: mean soil depth (cm); OC: organic carbon content (mass %); BD: bulk density (g cm−3); CACO3: calcium carbonate content (mass %); PH_H2O: pH in water (-); CEC: cation exchange capacity (cmol (+) kg−1).


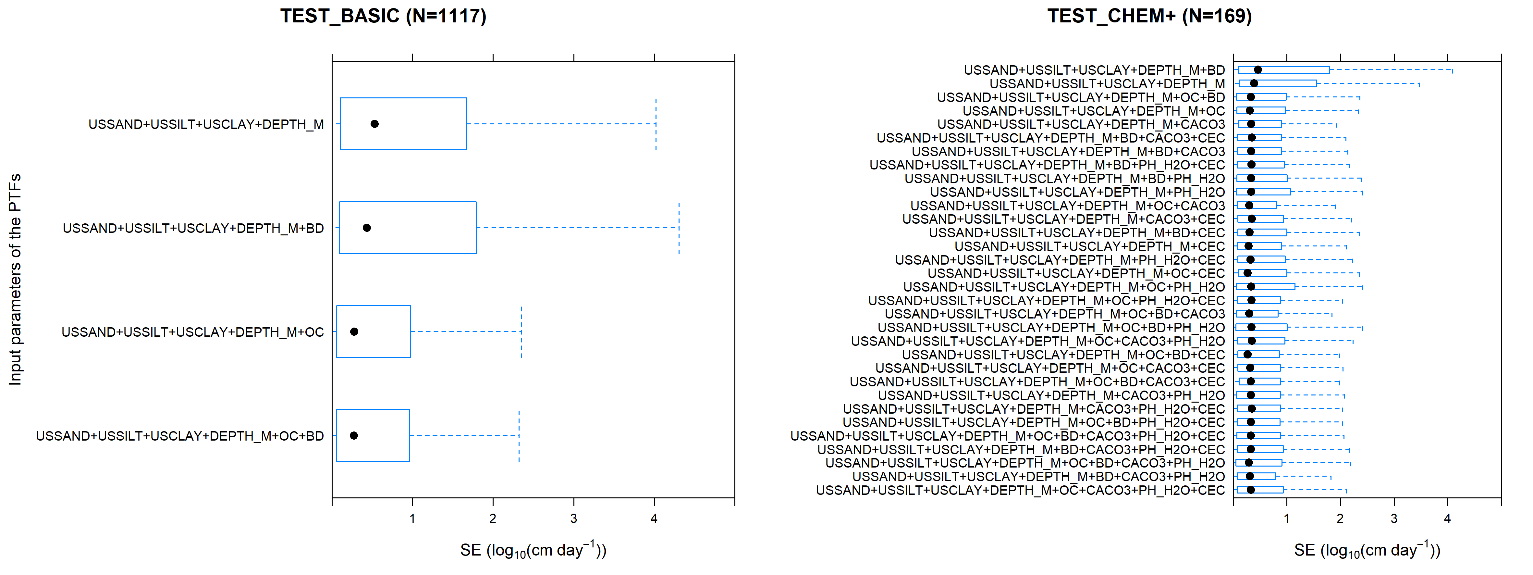


**Figure S14.** Squared error (SE) of the pedotransfer functions derived to predict saturated hydraulic conductivity (KS), computed on TEST_BASIC and TEST_CHEM+ set. USSAND: sand (50–2000 μm) content (mass %); USSILT: silt (2–50 μm) content (mass %), USCLAY: clay (<2 μm) content (mass %); DEPTH_M: mean soil depth (cm); OC: organic carbon content (mass %); BD: bulk density (g cm−3); CACO3: calcium carbonate content (mass %); PH_H2O: pH in water (-); CEC: cation exchange capacity (cmol (+) kg−1).


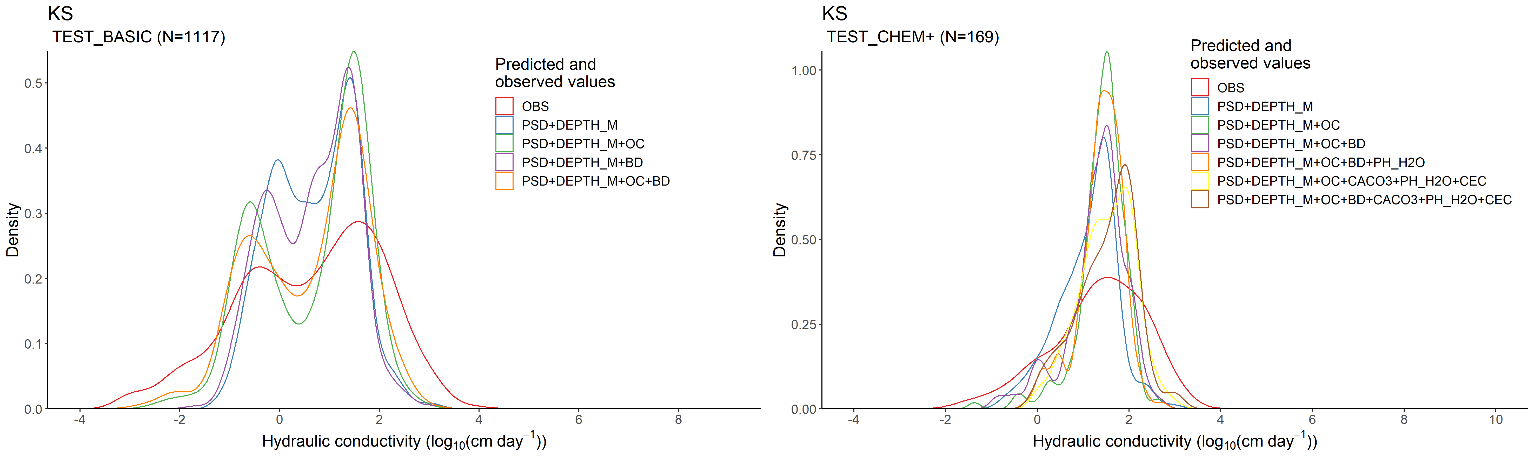


**Figure S15.** Density plot of observed (OBS) and predicted median (USSAND+USSILT+USCLAY+DEPTH_M+*) saturated hydraulic conductivity (KS) for selected pedotransfer functions, computed on TEST_BASIC and TEST_CHEM+ set. USSAND: sand (50–2000 μm) content (mass %); USSILT: silt (2–50 μm) content (mass %), USCLAY: clay (<2 μm) content (mass %); DEPTH_M: mean soil depth (cm); OC: organic carbon content (mass %); BD: bulk density (g cm−3); CACO3: calcium carbonate content (mass %); PH_H2O: pH in water (-); CEC: cation exchange capacity (cmol (+) kg−1).


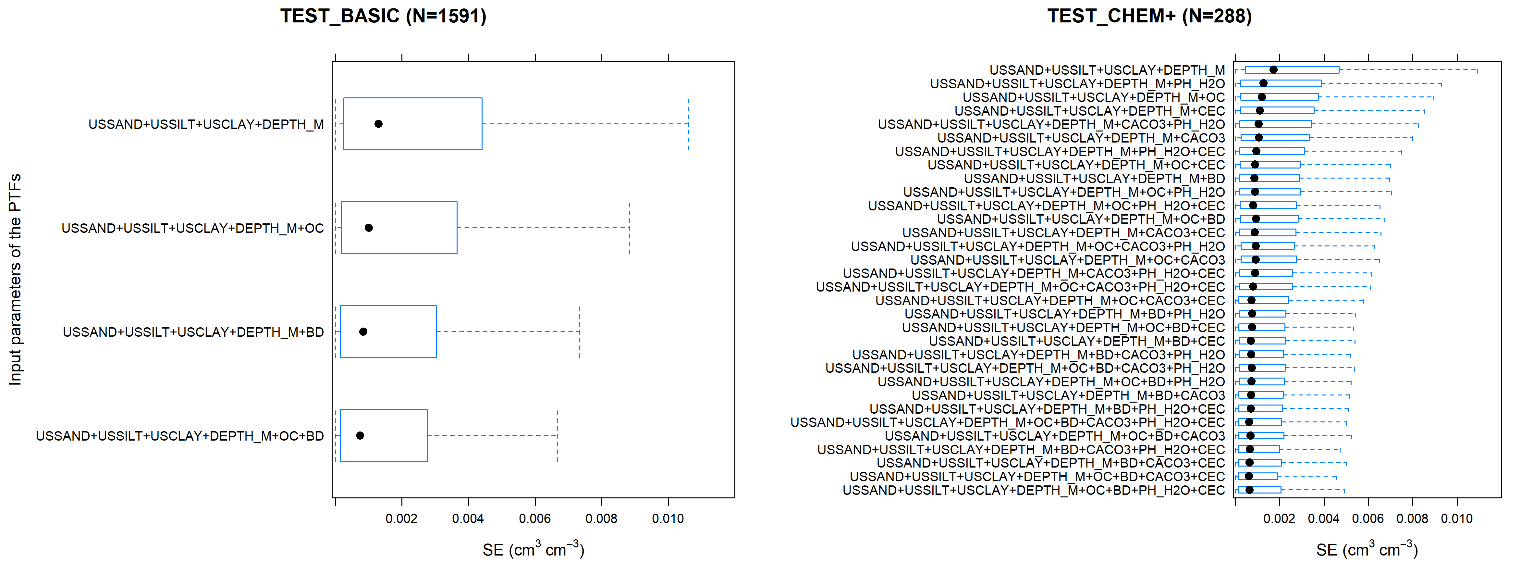


**Figure S16.** Squared error (SE) of the pedotransfer functions derived to predict parameters of the van Genuchten model for the description of the moisture retention curve (MRC), computed on TEST_BASIC and TEST_CHEM+ set. USSAND: sand (50–2000 μm) content (mass %); USSILT: silt (2–50 μm) content (mass %), USCLAY: clay (<2 μm) content (mass %); DEPTH_M: mean soil depth (cm); OC: organic carbon content (mass %); BD: bulk density (g cm−3); CACO3: calcium carbonate content (mass %); PH_H2O: pH in water (-); CEC: cation exchange capacity (cmol (+) kg−1).


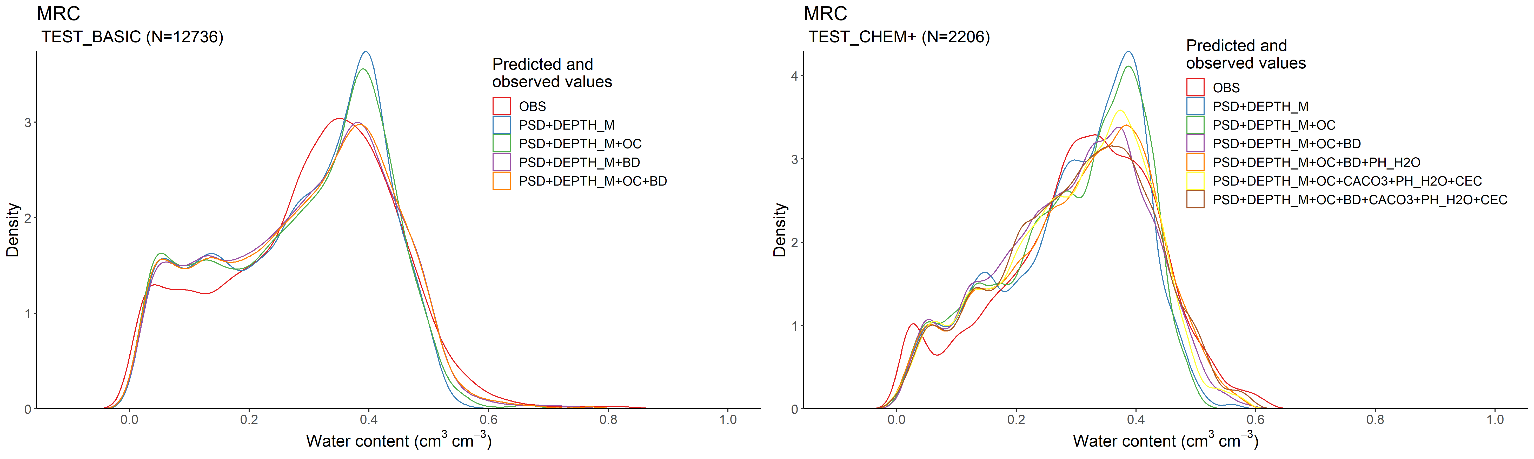


**Figure S17.** Density plot of observed (OBS) and predicted median (USSAND+USSILT+USCLAY+DEPTH_M+*) water retention values (MRC) computed based on the parameters of the van Genuchten model, computed on TEST_BASIC and TEST_CHEM+ set. Predicted values of those PTFs are shown which use the most often available predictor variables. USSAND: sand (50–2000 μm) content (mass %); USSILT: silt (2–50 μm) content (mass %), USCLAY: clay (<2 μm) content (mass %); DEPTH_M: mean soil depth (cm); OC: organic carbon content (mass %); BD: bulk density (g cm−3); CACO3: calcium carbonate content (mass %); PH_H2O: pH in water (-); CEC: cation exchange capacity (cmol (+) kg−1).

**
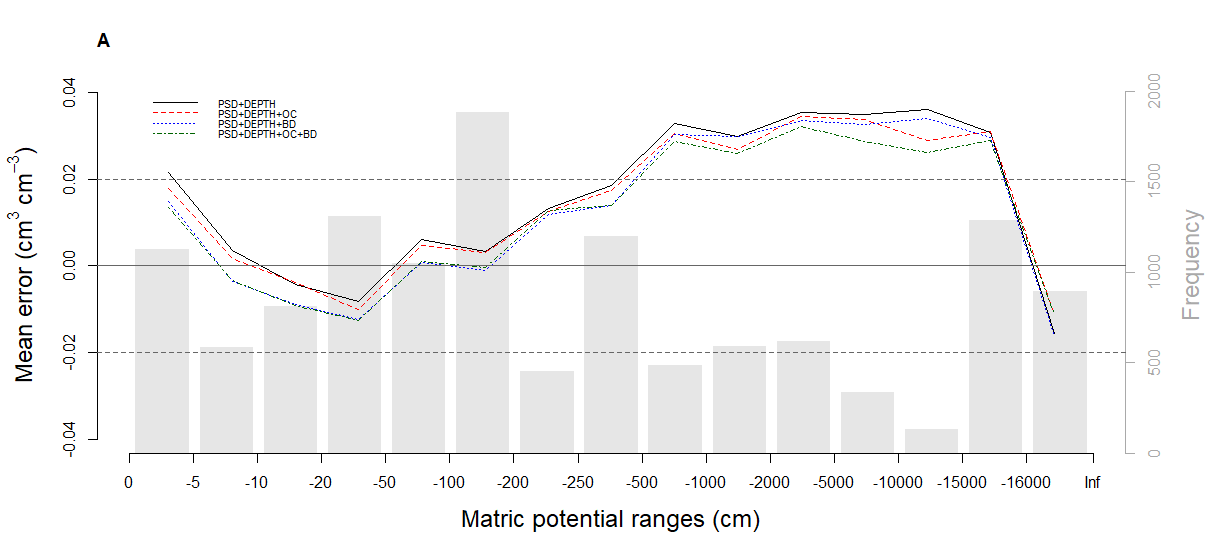
**

**
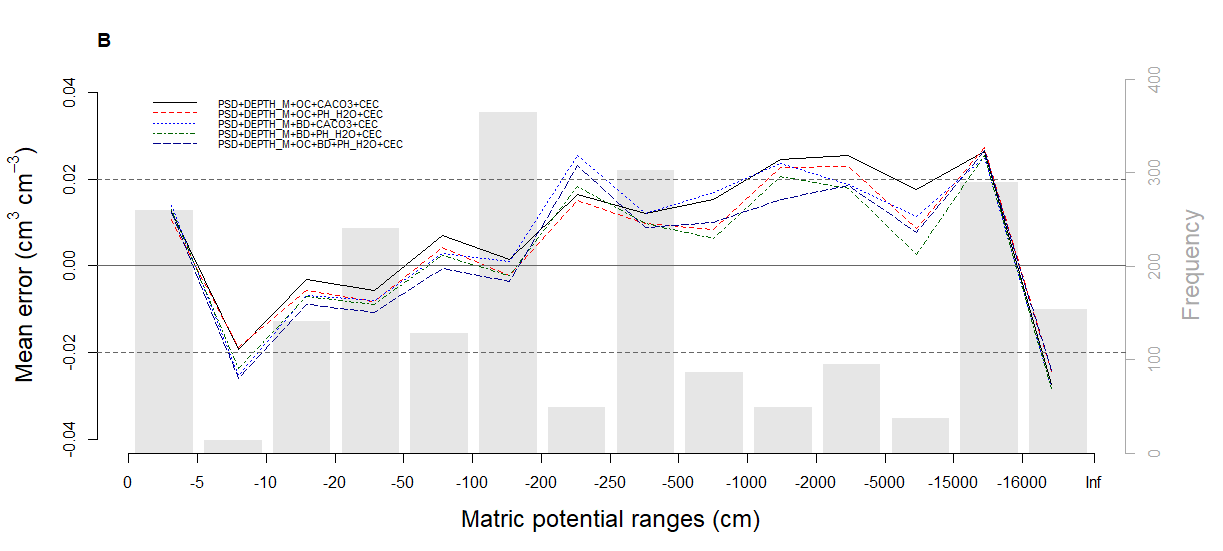
**

**Figure S18.** Mean error of the pedotransfer functions derived to predict parameters of the van Genuchten model for the description of the moisture retention curve, computed on TEST_BASIC (N = 1591) (A) and TEST_CHEM+ (N = 288) (B) sets by matric potential head values.


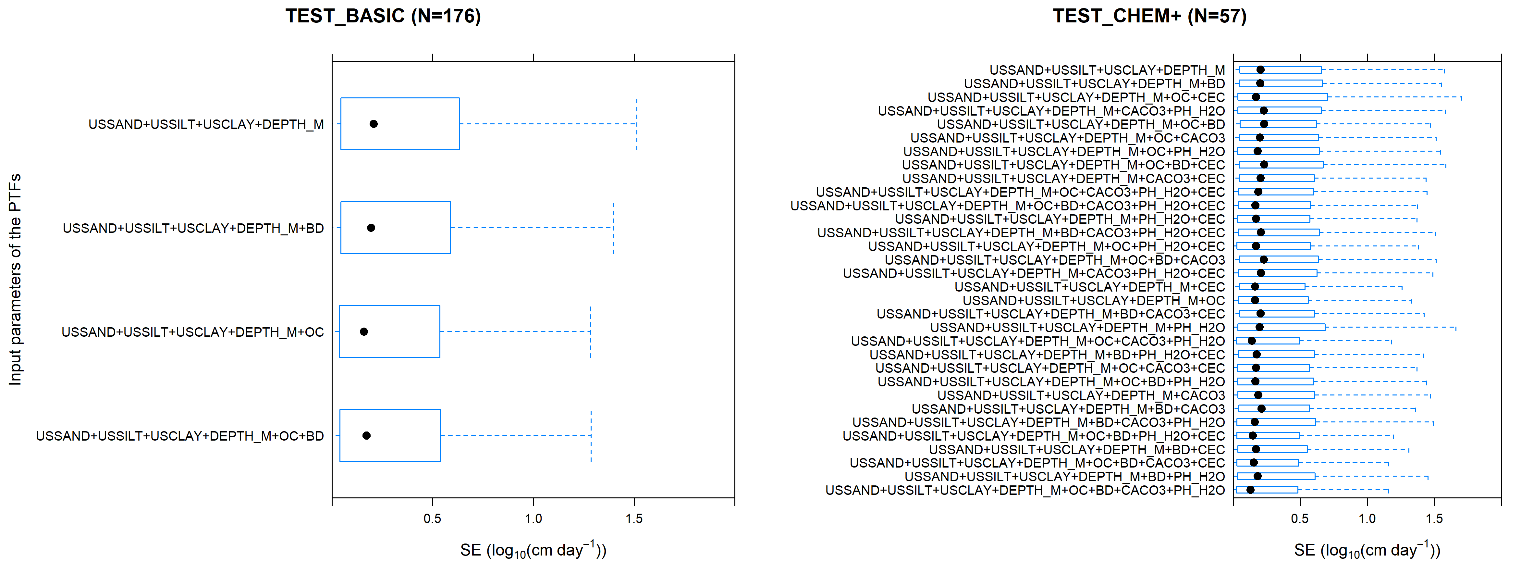


**Figure S19.** Squared error (SE) of the pedotransfer functions derived to predict parameters of the Mualem-van Genuchten model for the description of the hydraulic conductivity curve (HCC), computed on TEST_BASIC and TEST_CHEM+ set. USSAND: sand (50–2000 μm) content (mass %); USSILT: silt (2–50 μm) content (mass %), USCLAY: clay (<2 μm) content (mass %); DEPTH_M: mean soil depth (cm); OC: organic carbon content (mass %); BD: bulk density (g cm−3); CACO3: calcium carbonate content (mass %); PH_H2O: pH in water (-); CEC: cation exchange capacity (cmol (+) kg−1).


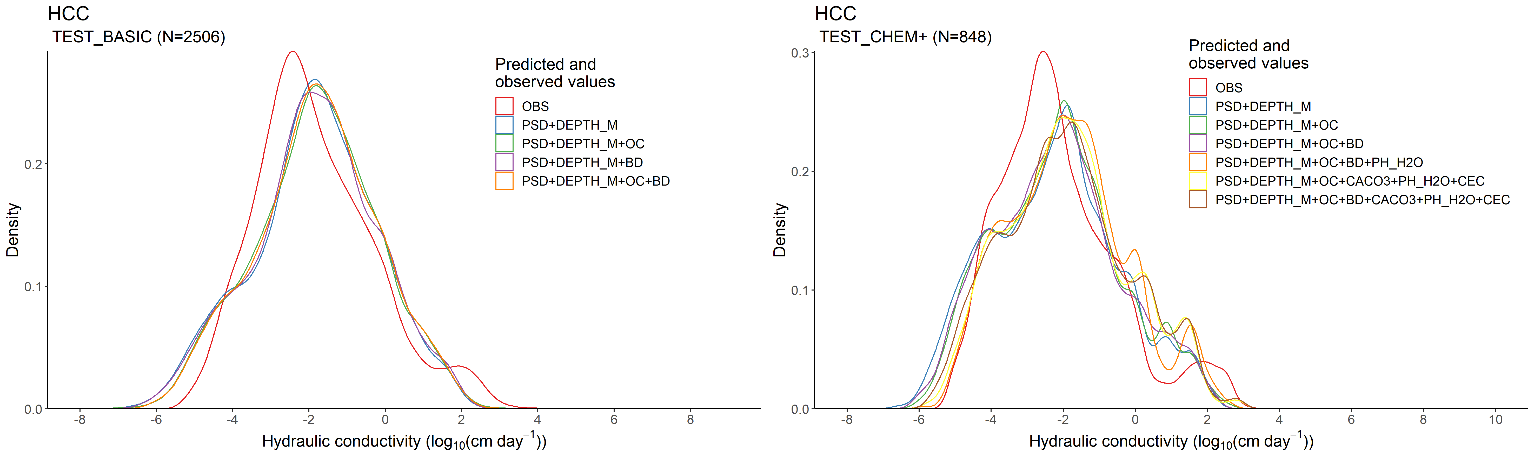


**Figure S20.** Density plot of observed (OBS) and predicted median (USSAND+USSILT+USCLAY+DEPTH_M+*) hydraulic conductivity values (HCC) computed based on the parameters of the Mualem-van Genuchten model, computed on TEST_BASIC and TEST_CHEM+ set. Predicted values of those PTFs are shown which use the most often available predictor variables. USSAND: sand (50–2000 μm) content (mass %); USSILT: silt (2–50 μm) content (mass %), USCLAY: clay (<2 μm) content (mass %); DEPTH_M: mean soil depth (cm); OC: organic carbon content (mass %); BD: bulk density (g cm−3); CACO3: calcium carbonate content (mass %); PH_H2O: pH in water (-); CEC: cation exchange capacity (cmol (+) kg−1).


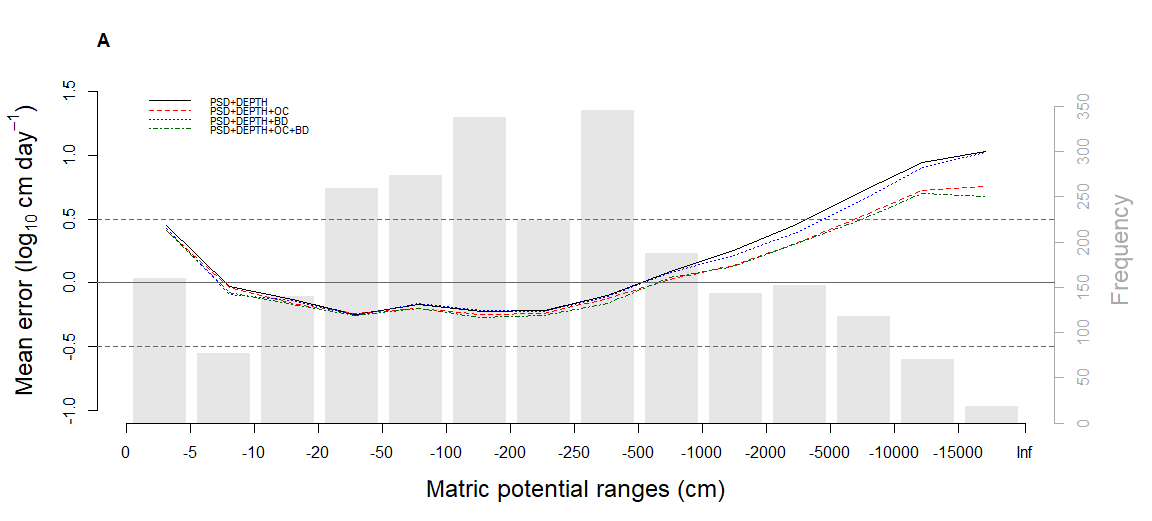


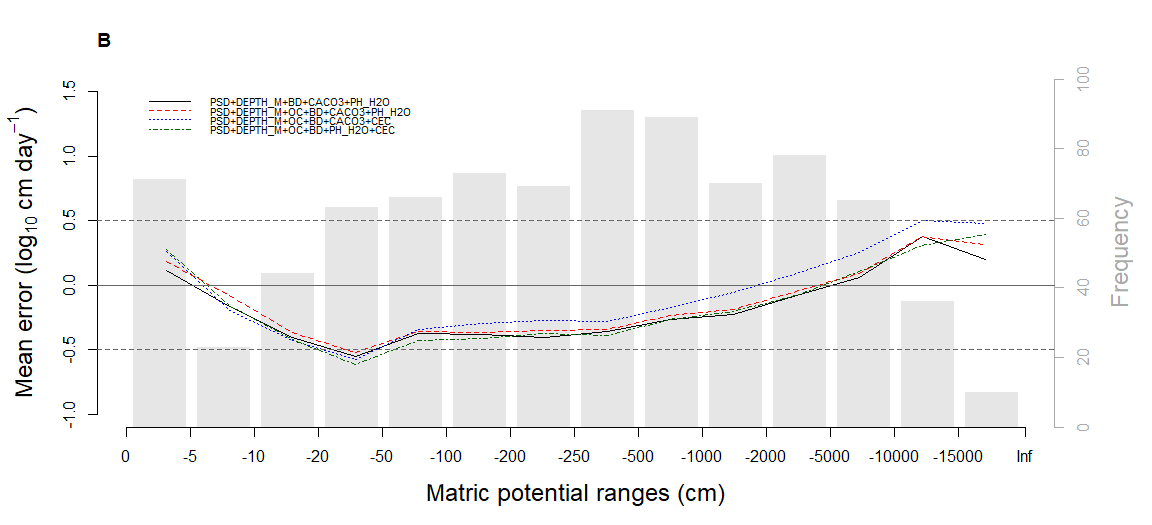


**Figure S21.** Mean error of the pedotransfer functions derived to predict parameters of the Mualem-van Genuchten model for the description of the hydraulic conductivity curve, computed on TEST_BASIC (N = 176) (A) and TEST_CHEM+ (N = 57) (B) sets by matric potential head values.

**Table S3.** List of recommended pedotransfer functions (PTFs) by predicted soil hydraulic property and available predictor variables.

| **Predictor variables1** | **Recommended PTFs2** | | | | | | | | |
| --- | --- | --- | --- | --- | --- | --- | --- | --- | --- |
| **THS** | **FC_2** | **FC** | **WP** | **AWC_2** | **AWC** | **KS** | **VG** | **MVG** |
| PSD+DEPTH_M | PTF01 | PTF01 | PTF01 | PTF01 | PTF01 | PTF01 | PTF01 | PTF01 | PTF01 |
| PSD+DEPTH_M+OC | PTF02 | PTF02 | PTF02 | PTF02 | PTF02 | PTF01 | PTF02 | PTF02 | PTF02 |
| PSD+DEPTH_M+BD | PTF03 | PTF03 | PTF01 | PTF01 | PTF03 | PTF01 | PTF01 | PTF03 | PTF01 |
| PSD+DEPTH_M+CACO3 | PTF04 | PTF01 | PTF01 | PTF01 | PTF01 | PTF01 | PTF01 | PTF04 | PTF04 |
| PSD+DEPTH_M+PH_H2O | PTF05 | PTF01 | PTF01 | PTF01 | PTF01 | PTF01 | PTF01 | PTF05 | PTF05 |
| PSD+DEPTH_M+CEC | PTF01 | PTF01 | PTF06 | PTF01 | PTF01 | PTF01 | PTF01 | PTF06 | PTF06 |
| PSD+DEPTH_M+OC+BD | PTF03 | PTF03 | PTF02 | PTF02 | PTF03 | PTF03 | PTF02 | PTF07 | PTF02 |
| PSD+DEPTH_M+OC+CACO3 | PTF02 | PTF02 | PTF02 | PTF07 | PTF02 | PTF01 | PTF02 | PTF08 | PTF02 |
| PSD+DEPTH_M+OC+PH_H2O | PTF02 | PTF02 | PTF02 | PTF07 | PTF02 | PTF01 | PTF02 | PTF09 | PTF02 |
| PSD+DEPTH_M+OC+CEC | PTF02 | PTF06 | PTF02 | PTF07 | PTF02 | PTF01 | PTF02 | PTF10 | PTF02 |
| PSD+DEPTH_M+BD+CACO3 | PTF03 | PTF03 | PTF03 | PTF01 | PTF03 | PTF01 | PTF01 | PTF11 | PTF04 |
| PSD+DEPTH_M+BD+PH_H2O | PTF03 | PTF03 | PTF03 | PTF01 | PTF03 | PTF01 | PTF05 | PTF12 | PTF12 |
| PSD+DEPTH_M+BD+CEC | PTF03 | PTF13 | PTF06 | PTF01 | PTF03 | PTF01 | PTF01 | PTF13 | PTF13 |
| PSD+DEPTH_M+CACO3+PH_H2O | PTF05 | PTF05 | PTF04 | PTF01 | PTF01 | PTF01 | PTF05 | PTF14 | PTF04 |
| PSD+DEPTH_M+CACO3+CEC | PTF04 | PTF04 | PTF04 | PTF01 | PTF01 | PTF01 | PTF01 | PTF15 | PTF04 |
| PSD+DEPTH_M+PH_H2O+CEC | PTF05 | PTF05 | PTF06 | PTF01 | PTF01 | PTF01 | PTF01 | PTF16 | PTF06 |
| PSD+DEPTH_M+OC+BD+CACO3 | PTF03 | PTF07 | PTF02 | PTF07 | PTF03 | PTF03 | PTF02 | PTF11 | PTF02 |
| PSD+DEPTH_M+OC+BD+PH_H2O | PTF03 | PTF07 | PTF02 | PTF07 | PTF03 | PTF03 | PTF02 | PTF12 | PTF02 |
| PSD+DEPTH_M+OC+BD+CEC | PTF03 | PTF13 | PTF07 | PTF07 | PTF03 | PTF03 | PTF02 | PTF13 | PTF02 |
| PSD+DEPTH_M+OC+CACO3+PH_H2O | PTF02 | PTF02 | PTF02 | PTF07 | PTF02 | PTF01 | PTF02 | PTF09 | PTF20 |
| PSD+DEPTH_M+OC+CACO3+CEC | PTF02 | PTF08 | PTF04 | PTF08 | PTF02 | PTF01 | PTF02 | PTF21 | PTF21 |
| PSD+DEPTH_M+OC+PH_H2O+CEC | PTF02 | PTF09 | PTF09 | PTF07 | PTF02 | PTF01 | PTF02 | PTF22 | PTF02 |
| PSD+DEPTH_M+BD+CACO3+PH_H2O | PTF03 | PTF03 | PTF03 | PTF01 | PTF03 | PTF01 | PTF05 | PTF11 | PTF23 |
| PSD+DEPTH_M+BD+CACO3+CEC | PTF03 | PTF11 | PTF11 | PTF01 | PTF03 | PTF01 | PTF01 | PTF24 | PTF04 |
| PSD+DEPTH_M+BD+PH_H2O+CEC | PTF03 | PTF12 | PTF11 | PTF01 | PTF03 | PTF01 | PTF05 | PTF25 | PTF12 |
| PSD+DEPTH_M+CACO3+PH_H2O+CEC | PTF05 | PTF05 | PTF14 | PTF05 | PTF01 | PTF01 | PTF05 | PTF15 | PTF04 |
| PSD+DEPTH_M+OC+BD+CACO3+PH_H2O | PTF03 | PTF07 | PTF02 | PTF07 | PTF03 | PTF03 | PTF02 | PTF11 | PTF27 |
| PSD+DEPTH_M+OC+BD+CACO3+CEC | PTF03 | PTF11 | PTF07 | PTF17 | PTF03 | PTF03 | PTF02 | PTF24 | PTF28 |
| PSD+DEPTH_M+OC+BD+PH_H2O+CEC | PTF03 | PTF12 | PTF07 | PTF07 | PTF03 | PTF03 | PTF02 | PTF29 | PTF29 |
| PSD+DEPTH_M+OC+CACO3+PH_H2O+CEC | PTF02 | PTF09 | PTF08 | PTF07 | PTF02 | PTF01 | PTF02 | PTF21 | PTF20 |
| PSD+DEPTH_M+BD+CACO3+PH_H2O+CEC | PTF03 | PTF11 | PTF06 | PTF05 | PTF03 | PTF01 | PTF05 | PTF24 | PTF12 |
| PSD+DEPTH_M+OC+BD+CACO3+PH_H2O+CEC | PTF03 | PTF18 | PTF07 | PTF09 | PTF03 | PTF03 | PTF02 | PTF29 | PTF27 |

1PSD: particle size distribution (sand, 50–2000 μm; silt, 2–50 μm; clay, <2 μm (mass %)); DEPTH: mean soil depth (cm); OC: organic carbon content (mass %); BD: bulk density (g cm−3); CACO3: calcium carbonate content (mass %); PH_H2O: pH in water (-); CEC: cation exchange capacity (cmol (+) kg−1). 2THS: saturated water content (pF 0); FC_2: water content at -100 cm matric potential head (pF 2.0); FC: water content at -330 cm matric potential head (pF 2.5); AWC_2: plant available water content based on FC_2; AWC: plant available water content based on FC; WP: water content at wilting point (pF 4.2); KS: saturated hydraulic conductivity; VG: parameters of the van Genuchten model; MVG: parameters of the Mualem – van Genuchten model; TEST_BASIC: samples with measured PSD, DEPTH, OC and BD; TEST_CHEM+: samples with measured PSD, DEPTH, OC, BD, CACO3, PH_H2O and CEC.
